# Supplementary material for: Elektronische Erhebung von Behandlungsergebnissen mittels Routine-Outcome-Monitoring: Pilotstudie zur Ökonomie und Zumutbarkeit für die Patienten
Source: Springer Nature journal article supplement (doi:10.1007/s00739-018-0492-0), 2018-08-14
Supplement: MOESM1 [file 16038710]

**Anhang**

PRO Erhebungsverfahren Teil 1 (Klinik Eggenburg und Rehaklinik Gars)

| **PRO Erhebungsverfahren** | **Ergebnisbereiche** |
| --- | --- |
| Patient Health Questionnaire (PHQ-9) | Symptome depressiver Störungen |
| Patient Health Questionniare (PHQ-15) | Somatisierungsstörungssymptome |
| Patient Health Questionnaire (GAD-7) | Angststörungssymptome |
| Schwartz Outcome Scale (SOS-10) | Allgemeines psychisches Befinden |
| WHO Disability Assessment Schedule (WHODAS) | Funktionsfähigkeit |
| Quality of Life Enjoyment and Satisfaction Questionnaire – Short Form (Q-LES-Q-SF) | Lebensqualität |
| Helping Alliance Questionnaire (HAQ) | Beziehung Patient - Therapeut |
| Treatment Credibility and Expetancy Questionnaire (CEQ) | Glaubwürdigkeit der Behandlung und Behandlungserwartung |
| Emotion Regulation Questionnaire (ERQ) | Emotionsregulation |
| Patientenzufriedenheitsfragebogen (ZUF-8) | Behandlungszufriedenheit |
| Maslach Burnout Inventory (MBI) | Burnout-Symptomatik |
| Childhood Trauma Questionnaire (CTQ) | Kindheitstrauma |

PRO Erhebungsverfahren Teil 2 (nur Eggenburg)

| **PRO Erhebungsverfahren** | **Ergebnisbereich** |
| --- | --- |
| ***Kompetenzbereich Abhängigkeitserkrankungen (A1/A2)*** | |
| Alcohol Use Disorders Identification Test (AUDIT) | Alkoholbezogene Störungen |
| Tobacco, Alcohol, and Drug Questionnaire (TAD) | Tabak-, Alkohol- und Drogenkonsum |
| Gedankenunterdrückungs-Inventar (GUI) | Gedankenunterdrückung |
| Experience in Close Relationships (ECR-R) | Bindungsbezogene Angst und Vermeidung |
| Metacognition Questionnaire for Alcohol Abusers (MCQ) | Metakognitive Erfahrungen und Strategien bzgl. Alkohol(missbrauch) |
| Schema Mode Inventory (SMI) | Schema Modi |
| Movie for the Assessment of Social Cognition (MASC) | Fundamentale Denkfunktionen (Theory-of-Mind) |
| ***Kompetenzbereich Affektive, Angst-, Zwangsstörungen (AZ)*** | |
| Yale-Brown Obsessive Compulsive Scale (YBOCS) | Zwangsstörungssymptome |
| Liebowitz Social Anxiety Scale (LSAS) | Symptome sozialer Phobie |
| Positive and Negative Affect Schedule (PANAS) | Positive- und negative Affektivität |
| Reading the Mind in the Eyes Test (RME) | Theory-of-Mind |
| ***KB Essstörungen (E1)*** | |
| Eating Disorder Examination Questionnaire  (EDE-Q) | Essstörungssymptome |
| Rosenberg Self-Esteem Scale (R-SES) | Selbstsicherheit |
| Experience in Close Relationships (ECR-R) | Bindungsbezogene Angst und Vermeidung |
| ***KB Essstörungen (E2 Adipositas)*** | |
| Experience in Close Relationships (ECR-R) | Bindungsbezogene Angst und Vermeidung |
| Fat-Related Diet Habits Questionnaire (FRDHQ) | Essensauswahl |
| Three-Factor Eating Questionnaire (TFEQ) | Essverhalten |
| Pittsburgh Sleep Quality Index (PSQI) | Schlafqualität und mögliche Schlafstörungen |
| International Physical Activity Questionnaire (IPAQ) | Zeit und Art der Bewegungsgewohnheiten |
| GesundheitsCheck Diabetes (FINDRISK) | Diabetes Typ-2 Risiko |
| ***KB Persönlichkeitsstörungen (P1/P2)*** | |
| 10 Items Big Five Inventory (BFI-10) | „Big Five“ Persönlichkeitsdimensionen |
| Adult ADHD Self-Report Scale Symptom Checkliste (ASRS) | ADHS Symptome |
| Schema Mode Inventory (SMI) | Schema Modi |
| Movie for the Assessment of Social Cognition (MASC) | Theory-of-Mind |
| ***Kompetenzbereich Schmerz- und Somatoforme Störungen (S)*** | |
| Numerical Rating Scale for Pain (NRS) | Schmerzintensität |
| Short-Form McGill Pain Questionnaire (SF-MPQ) | Evaluative Aspekte d. Schmerz, Schmerzintensität |
| Pain Catastrophizing Scale (PCS) | Schmerz-katastrophisierende Gedanken und Verhaltensweisen |
| Anxiety Sensitivity Index (ASI) | Angstsensitivität |
| Empathy Quotient (EQ) | Empathie Fähigkeiten |
| White Theory of Mind Animations (ToM) | Theory of Mind bzw. Mentalisierungsfähigkeit |
| ***KB Trauma (T1/T2)*** | |
| Posttraumatic Stress Disorder Checklist (PCL-C) | Kernsymptomatik d. PTBS |
| Posttraumatic Cogitions Inventory (PTCI) | Negative Kognitionen nach traumatischen Erlebnissen |
| 10 item Connor-Davidson Resilience Scale  (CD-RISC) | Resilienz |
| Dissociative Experience Scale (DES-II) | dissoziative Symptome |

Papierfragebogen mit Fragen zur Evaluation des CHES
